# Supplementary material
Source: HighWire-hosted journal article supplement (https://rapm.bmj.com/content/44/3/303)
Supplement: inline-supplementary-material-2 [file inline-supplementary-material-2.docx]

**Appendix II:** Summary of individual comorbidities stratified by OSA status.

|  | **No OSA (n = 38,538)** | **OSA (n = 3,228)** | **p-value** |
| --- | --- | --- | --- |
| Hypothyroidism | 5,647 (14.7) | 433 (13.4) | 0,059 |
| Renal | 921 (2.4) | 131 (4.1) | <0.001 |
| Obesity | 7,972 (20.7) | 1,501 (46.5) | <0.001 |
| Valvular | 2,914 (7.6) | 198 (6.1) | 0,003 |
| Hypertension | 18,741 (48.6) | 1,958 (60.7) | <0.001 |
| Congestive Heart Failure | 270 (0.7) | 59 (1.8) | <0.001 |
| Tobacco | 9,127 (23.7) | 928 (28.7) | <0.001 |
| Pulmonary | 3,889 (10.1) | 595 (18.4) | <0.001 |
| Psychoses | 394 (1.0) | 54 (1.7) | 0,001 |
| Depression/anxiety | 6,421 (16.7) | 722 (22.4) | <0.001 |
| Diabetes | 3,702 (9.6) | 682 (21.1) | <0.001 |
|  |  |  |  |
| Data are presented as number (%) with each comorbidity. | |  |  |
| Comparisons between OSA vs. no OSA groups are done using a chi squared test.  OSA: obstructive sleep apnea | | |  |
